# Supplementary material for: NPAS4 Exacerbates Pyroptosis via Transcriptionally Regulating NLRP6 in the Acute Phase of Intracerebral Hemorrhage in Mice
Source: MDPI journal article supplement (doi:10.3390/ijms24098320), 2023-05-05
Supplement: s1 [file s1]

## Supplementary Materials

**Supplementary Table S1.** Human tissue information.

| Sample | sex | age      | Possible bleeding causes     | ICH location                     | Sample collection time       | Estimated ICH volume |
|--------|-----|----------|------------------------------|----------------------------------|------------------------------|----------------------|
| ICH 1  | M   | 11       | Arteriovenous malformation   | Left parietal-occipital lobe     | 20 hours after symptom onset | 40mL                 |
| ICH 2  | F   | 11       | Cerebrovascular malformation | Left frontotemporal lobe         | 25 hours after symptom onset | 30mL                 |
| ICH 3  | F   | 10       | Arteriovenous malformation   | Midline area, left parietal lobe | 19 hours after symptom onset | 30mL                 |
| CTR1   | M   | New-born | -                            | -                                | -                            | -                    |
| CTR2   | M   | 59       | -                            | -                                | -                            | -                    |
| CTR3   | F   | 60       | -                            | -                                | -                            | -                    |

**Supplementary Table S2.** Primer sequences of plasmids construction.

| Gene name                             | Species    | Primer sequences                                                                                     |
|---------------------------------------|------------|------------------------------------------------------------------------------------------------------|
| NPAS4 overexpression plasmids(H18894) |            |                                                                                                      |
| NPAS4                                 | <i>Mus</i> | Forward: CTAGCTAGCATGTACCGATCCACCAAGGG<br>Reverse: CCGCTCGAGAAACGTTGGTCCCCCTCCAC                     |
| pGL4.10-Nlrp6 promotor                |            |                                                                                                      |
| NLRP6 (segment 1)                     | <i>Mus</i> | Forward: GGGGTACCTGGTCATATTTGTATGTCTGTGCC<br>Reverse: CTAGCTAGCTAGCTTCCCTACGTGGGTCT                  |
| NLRP6 (segment 2)                     | <i>Mus</i> | Forward: GGGGTACCGCTTGGCTTTGTATTTCTTC<br>Reverse: CTAGCTAGCTAGCTTCCCTACGTGGGTCT                      |
| NLRP6 (segment 3)                     | <i>Mus</i> | Forward: GGGGTACCGCCCTCTTGATTTTCACGCC<br>Reverse: CTAGCTAGCTAGCTTCCCTACGTGGGTCT                      |
| pGL4.10-Nlrp6 promotor mutant         |            |                                                                                                      |
| NLRP6 (site 1)                        | <i>Mus</i> | Forward: CCTTATACTTCACTAACATGCCGATGAATACCATAAGCG<br>Reverse: CGCTTATGGTATTCATCGGCATGTTAGTGAAGTATAAGG |
| NLRP6 (site 2)                        | <i>Mus</i> | Forward: GTGGAGGTGTGACACATGTAATTTACACACGTC<br>Reverse: ACGGACGTGTGTAAATTACATGTGTCACACCTCCA           |
| NLRP6 (site 3)                        | <i>Mus</i> | Forward: AAAGGTCGCAGTCCCTACACGCGCTGATGTTACAA<br>Reverse: TTGTAACATCAGCGCGTGTAGGGACTGCGACCTTT         |
| Ligation segments                     | <i>Mus</i> | Forward: GGGGTACCTGGTCATATTTGTA<br>Reverse: CTAGCTAGCTAGCTTCCCTACGT                                  |

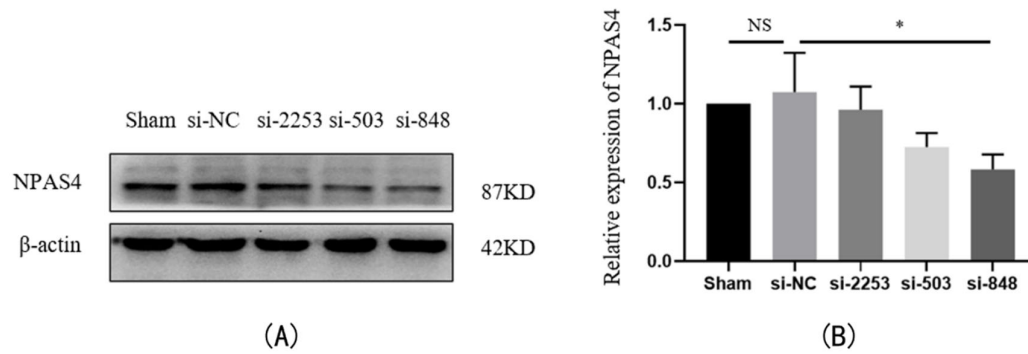

**Supplementary Figure S1.** Western blot was used to screen out the optimum interference fragments for NPAS4 in C57BL/6 and relative protein level was normalized to  $\beta$ -actin. \* $p < 0.05$  vs si-NC. As the figures showed, group of si-848 injection represented the most interference effect on NPAS4 expression level among four groups.

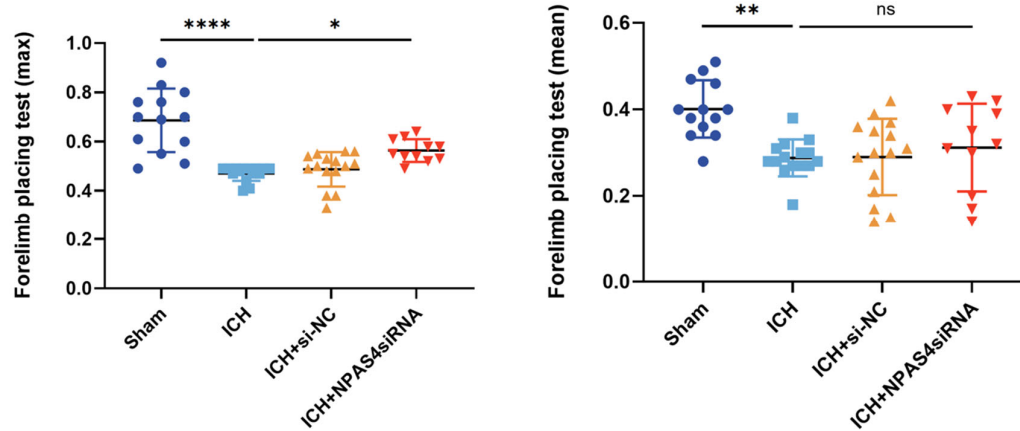

**Supplementary Figure S2.** Grip strength test (forelimb placing test) was conducted to assess neurological function (max and mean value were calculated). Sham, mice without any treatments,  $n=13$ ; ICH, mice without injection before ICH induction,  $n=15$ ; ICH+NC, mice with scrambled siRNA injection at 24h before ICH induction,  $n=15$ ; ICH+NPAS4-siRNA, mice with NPAS4-siRNA injection at 24h before ICH induction,  $n=11$ . The data are shown as mean  $\pm$  SD. \* $p < 0.05$  vs. ICH, \*\* $p < 0.01$  vs. Sham, \*\*\*\* $p < 0.0001$  vs. Sham. As the pictures above displayed, forelimb muscle strength was significantly decreased in ICH group (max values,  $0.47 \pm 0.03$ N; mean values,  $0.29 \pm 0.04$ N) compared with sham group (max values,  $0.67 \pm 0.13$ N; mean values,  $0.40 \pm 0.07$ N), which was consistent with the data of four-limb strength test we've done before. Similarly, ICH+NPAS4-siRNA group (max values,  $0.56 \pm 0.05$ N) showed increased max forelimb strength in comparison with ICH group. On the contrary, mean forelimb strength was not improved when compared ICH+NPAS4-siRNA group (mean values,  $0.31 \pm 0.10$ N) to ICH group. Anyway, the difference was probably caused by inappropriate experimental manipulations or uncooperative mice.

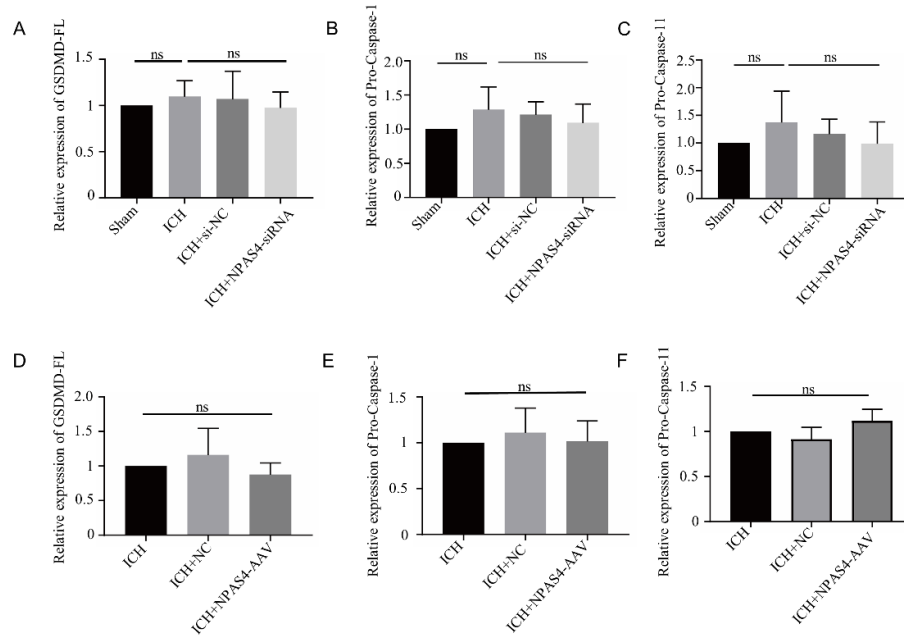

**Supplementary Figure S3.** Effect of regulating NPAS4 on the protein levels of GSDMD-FL, Pro-Caspase-1 and Pro-Caspase-11 at 24h after ICH. (A-C) Western blot was used to detect the protein levels of GSDMD-FL, Pro-Caspase-1 and Pro-Caspase-11 after NPAS4 inhibiting, n=4/group; (D-F) Western blot was used to detect the protein levels of GSDMD-FL, Pro-Caspase-1 and Pro-Caspase-11 after NPAS4 overexpression, n=3/group. The relative protein level was normalized to  $\beta$ -actin. ns,  $p>0.05$ . As the figures showed, the densitometry results of Pro-caspase-1, Pro-caspase-11, and GSDMD-FL did not show significant differences among the treatment groups.
